# Supplementary material for: Emerging Therapeutic Targets Against Toxoplasma gondii: Update on DNA Repair Response Inhibitors and Genotoxic Drugs
Source: Front Cell Infect Microbiol. 2020 Jun 12;10:289. doi: 10.3389/fcimb.2020.00289 (PMC7325978; doi:10.3389/fcimb.2020.00289)
Supplement: Supplementary file 1 [file Table_1.xlsx]

## Sheet: Hoja1
Table S1. List of drugs discussed in the review and classified according to the state of approvals for use in humans or animals, clinical trials and danger to the host. Web pages are indicated. FDA: U. S. Food and Drug Administration.
Drug (T1, T2 and T3:ordered according to table 1, 2 and 3, respectively)	FDA	Clinical Trials (only the major completed/terminated phase is shown)	Harmfulness Bold letter: Chemical safety classification. In some cases, when available, some additional relevant comments were considered
web page	https://www.accessdata.fda.gov/scripts/cder/daf/index.cfm	https://clinicaltrials.gov/ct2/home	https://pubchem.ncbi.nlm.nih.gov/compound/
	http://drugcentral.org/
T1
Camptothecin	not approved	no studies found (studies with camptothecin analog named CZ48)	acute toxic
10-Hydroxycamptothecin	not approved	cancer, 3 studies completed phase 2	irritant
Betulin	not approved	wound healing of Split-Thickness Skin Graft donor sites and burn, 3 studies completed phase 3	not classified
Etoposide	approved for human use	cancer, 5 studies completed phase 4	irritant, health hazard carcinogenicity, systemic toxicity, hepatoxicity
Genistin	not approved	major depression, 1 study completed phase 2	not classified, no comments
Daunorubicin	approved for human use	leukemia and lymphoma, 11 studies completed phase 4	acute toxic, health hazard unproven but suspected cause of clinically apparent liver injury, suspected of causing genetic defects
Trovafloxacin	approved for human use	bacterial infection, no data for phase	not classified, overdose is toxic
Ciprofloxacin	approved for human use	bacterial infection, 36 studies completed phase 4	irritant, health hazard reproductive toxicity, likely cause of clinically apparent liver injury
Ofloxacin	approved for human use	inflammatory disease, infections, 42 studies completed phase 4	irritant, health hazard mild elevations in ALT and alkaline phosphatase levels
Fleroxacin	not approved	obesity, 1 study completed phase 1	health hazard may cause damage to organs
Temafloxacin	not approved	no studies found	not classified severe allergic reactions and hemolytic anemia
Tosufloxacin	not approved	no studies found	not classified, no comments
Enrofloxacin	approved for veterinary use only	pharmacokinetics, phase not applicable	irritant, health hazard suspected of damaging fertility or the unborn child, damage to organs through prolonged or repeated exposure
Gatifloxacin	approved for human use	various, 10 studies completed phase 4	irritant
Doxorubicin	approved for human use	cancer and others, 24 studies completed phase 4	irritant, health hazard may cause cancer
Aclarubicin	not approved	cerebral leukodystrophy (1 study active)	acute toxic
Artemisinin	not approved	malaria and others, 29 studies completed phase 4	not classified possible rare cause of clinically apparent liver injury
Artemether	approved for human use	Malaria, HIV, and others, 49 studies completed phase 4	irritant
Artemisinin derivatives	not approved	malaria and others, 29 studies completed phase 4	not classified, no comments
Harmane	not approved	lacerations and long-tem memory, 2 studies completed phase 2	not classified altered sleep time
Harmine	not approved	major depression, 1 study completed phase 2	not classified hallucinations, distorted perceptions; cardiac: change in rate
norHarmane	not approved	no studies found	irritant
Fluorouracil (5-FU)	approved for human use	cancer, 30 studies completed phase 4	acute toxic, irritant, health hazard germ cell mutagenicity, reproductive toxicity, well known cause of clinically apparent liver injury
Vincristine	approved for human use	cancer and others, 21 studies completed phase 4	not classified toxic in combination with itraconazole, phenytoin and verapamil
Fluphenazine	approved for human use	schizophrenia, 3 studies completed phase 4	irritant, acute toxic probable cause of clinically apparent liver injury
Thioridazine	approved for human use	schizophrenia, 1 study completed phase 4	irritant side effects
Trifluoperazine	approved for human use	schizophrenia, 1 study completed phase 4	not classified overdose is toxic
Hycantone	not approved	no studies found	irritant, health hazard probably carcinogenic in humans
Phleomycin	not approved	no studies found	irritant behavorial alterations
Mitomycin C	approved for human use	glaucoma, 10 studies completed phase 4	acute toxic, health hazard probably carcinogenic in humans
Thiosemicarbazones	not approved	prostatate cancer and renal blood flow, 2 studies completed phase 2	not classified, no comments
Hydroxyurea	approved for human use	HIV and others, 4 studies completed phase 4	irritant probable cause of clinically apparent liver injury
Cytarabine	approved for human use	Leukemia and others, 25 studies completed phase 4	irritant, health hazard germ cell mutagenicity, reproductive toxicity, probable cause of clinically apparent liver injury
Methyl Methanesulphonate (MMS)	not approved	cancer and nerve agent intoxication, 2 studies completed phase 1	acute toxic, irritant, health hazard carcinogenicity
T2
Resveratrol	not approved	endometriosis and rhinitis, 2 studies completed phase 4	irritant genotoxic
Tamoxifen	approved for human use	various subjects, 17 studies completed phase 4	irritant, health hazard carcinogenicity, reproductive toxicity, probable rare cause of clinically apparent liver injury
Butein	not approved	no studies found	not classified, no comments
Amphotericin	approved for human use	Visceral leishmaniasis and others, 16 studies completed phase 4	irritant probable cause of clinically apparent liver injury, overdoses can result in cardio-respiratory arrest
Menadione	approved for human use (Discontinued)	various subjects, 31 studies completed phase 4	irritant, health hazard hemolytic anemia, Large doses have also been reported to cause brain damage
Capsiacin	not approved	diabetes, 1 study completed, phase not applicable	no data
Sertraline	approved for human use	various subjects, 63 studies completed phase 4	not classified likely but rare cause of clinically apparent liver injury, behavioral alterations
Andrographolide	not approved	multiple sclerosis and arthritis, 2 studies completed phase 2	irritant
Chloroquine	approved for human use	Malaria and others, 28 studies completed phase 4	irritant possible rare cause of clinically apparent liver injury
Loperamide	approved for human use	Travelers' Diarrhea and others, 14 studies completed phase 4	acute toxic
Purvalanol A	not approved	no studies found	not classified, no comments
SB 218078	not approved	no studies found	not classified, no comments
Valproic acid	approved for human use	schizophrenia and others, 56 studies completed phase 4	irritant, health hazard reproductive toxicity
T3
KU-55933	not approved	no studies found	not classified, no comments
NU 7026	not approved	no studies found	not classified, no comments
Quercetin	not approved	various subjects, 3 studies completed phase 4	acute toxic, irritant
LY 294002	not approved	neuroblastoma, 1 study terminated phase 1	not classified, no comments
Caffeine	approved for human use	various subjects, 39 studies completed phase 4	irritant
SAHA/vorinostat	approved for human use	cancer, 5 studies completed phase 3	irritant, health hazard reproductive toxicity
Scriptaid	not approved	no studies found	not classified, no comments
Trichostatin A	approved for human use	cardivascular diseases, 6 studies completed phase 4	irritant
Sodium butyrate	approved for human use	alcohol dependence, 1 study completed phase 4	irritant, healt hazard germ cell mutagenicity
Valproic acid	approved for human use	neurological disorders, 56 studies completed phase 4	irritant, health hazard reproductive toxicity
4-phenylbutyrate	approved for human use	urea cycle disorders and diabetes, 3 studies completed phase 4	irritant
Curcumin	not approved	periodontitis, depression and others, 7 studies completed phase 4	irritant, health hazard possible cause of clinically apparent liver injury
Nicotinamide	approved for human use	various subjects, 42 studies completed phase 4	irritant
Resveratrol	see T2	see T2	see T2
Harmine	see T1	see T1	see T1
